# Supplementary material for: Akkermansia muciniphila Alleviates Dextran Sulfate Sodium (DSS)-Induced Acute Colitis by NLRP3 Activation
Source: PubMed Central journal article supplement (PMC8510245; doi:10.1128/spectrum.00730-21), 2021-10-06
Supplement: spectrum00730-21_supp_1_seq1.pdf [file spectrum00730-21_supp_1_seq1.pdf]

Supplementary materials

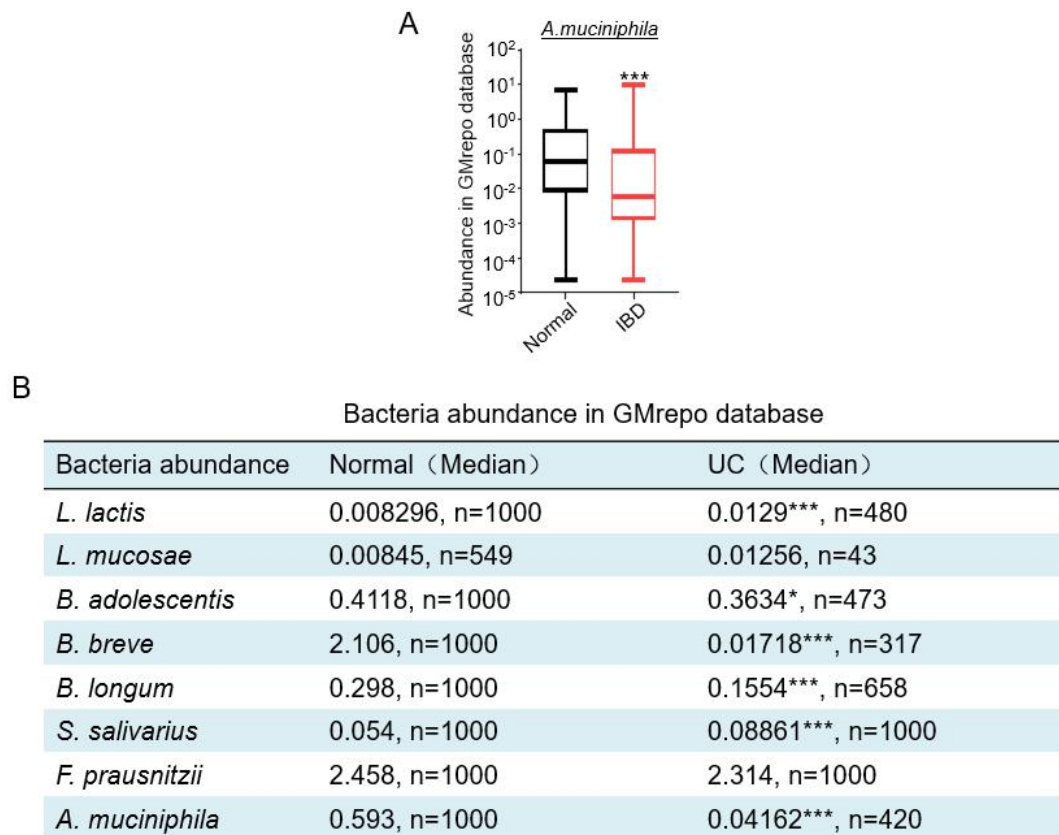

**Supplementary Figure 1.** (A) The level of *A. muciniphila* in the stool of normal people (n=1000) and IBD patients (n=399) in GMrepo database. (B) Details of the abundance of *L. lactis*, *L. mucosae*, *B. adolescentis*, *B. breve*, *B. longum*, *S. salivarius*, *F. prausnitzii* and *A. muciniphila* in the stool of normal people and UC patients in GMrepo database including exact sample numbers, medians and values, the graph (in Figure 1) exactly matched with this table. \*p < 0.05, \*\*\*p < 0.001 (Mann Whitney test). IBD, inflammatory bowel disease; UC, ulcerative colitis.

**Supplementary Table1.** The clinical characteristics of UC patients

| Cohort                  | Mean±SD       |                |
|-------------------------|---------------|----------------|
|                         | Low-Akk (n=6) | High-Akk (n=6) |
| Age                     | 48±10.8       | 39.5±12.1      |
| Sex                     |               |                |
| Male                    | 2             | 3              |
| Female                  | 4             | 3              |
| Height (m)              | 1.7±0.1       | 1.6±0.1        |
| Body weight(kg)         | 60.2±10.7     | 58.3±5.6       |
| BMI(kg/m <sup>2</sup> ) | 21.7±2.4      | 21.8±1.9       |
| Smoking                 |               |                |
| Yes                     | 0             | 0              |
| No                      | 6             | 6              |
| Drinking                |               |                |
| Yes                     | 0             | 0              |
| No                      | 6             | 6              |
| Activity                |               |                |
| Mild                    | 3             | 3              |
| Moderate                | 3             | 2              |
| Severe                  | 0             | 1              |
